# Supplementary material
Source: PubMed Central journal article supplement (PMC6588827)
Supplement: mmc1.pdf [file mmc1.pdf]

**Biophysical Journal, Volume 116**

**Supplemental Information**

**Computational Tool to Study Perturbations in Muscle Regulation and  
Its Application to Heart Disease**

**Samantha K. Barrick, Sarah R. Clippinger, Lina Greenberg, and Michael J. Greenberg**

## **Supporting Materials**

### **Protein expression and purification**

Cardiac ventricular myosin and actin were prepared from cryoground porcine ventricles (Pelfreez) as previously described (1). Cardiac actin was labeled with N-(1-pyrenyl)iodoacetamide (pyrene-actin) as described in (2, 3). The concentration of pyrene-actin was determined by measuring the absorbances at 290 nm and 344 nm. Myosin subfragment-1 (S1) was prepared from full-length myosin by chymotrypsin digestion (4), and its purity was assessed using SDS-PAGE.

Recombinant human tropomyosin was expressed in BL21-CodonPlus cells (Agilent) and purified using established protocols (5). The concentration of tropomyosin was determined by measuring the absorbance at 280 nm.

Human recombinant troponin I, troponin C, and troponin T were expressed in BL21-CodonPlus cells (Agilent), complexed, and purified using established protocols (6), with the modification that the final complexed protein was purified using a MonoQ column. Troponin complex concentration was measured spectroscopically using the Bradford reagent (Coomassie Plus Assay kit, Thermo Scientific). The  $\Delta E160$  mutation in troponin T was introduced using the QuikChange Site-Directed Mutagenesis Kit (Agilent) and verified by sequencing (GENEWIZ). The  $\Delta E160$  protein was expressed, purified, and complexed into functional troponin units using the same procedure as the WT protein.

### **Stopped-flow kinetic measurements**

Stopped-flow transient kinetic measurements were carried out in buffer containing 60 mM MOPS, 200 mM KCl, 5 mM MgCl<sub>2</sub>, 1 mM DTT, 2 mM EGTA, and either 5.2 μM CaCl<sub>2</sub> (pCa 9) or 2.15 mM CaCl<sub>2</sub> (pCa 4). Total concentrations of calcium, magnesium, ATP, and EGTA added were calculated using MaxChelator (7). Prior to measurements, tropomyosin was reduced by addition of 50 mM DTT, heated at 56 °C for 5 min, and allowed to cool to room temperature before centrifuging 30 min at 436000 x g at 4 °C in an Optima MAX-TL Ultracentrifuge (Beckman Coulter) equipped with a TLA 120.2 rotor (Beckman Coulter). Phalloidin-stabilized, pyrene-labeled actin filaments were prepared by incubating 50 μM pyrene-actin with 55 μM phalloidin in low-calcium buffer at least 10 min at room temperature. Pyrene was excited at 365 nm, and the fluorescence emission was detected using a 395-nm cutoff filter. Apyrase (0.02 units/mL) was added to each protein solution before mixing to ensure the absence of nucleotide (i.e., ATP and ADP).

### **Measurement of $K_B$ using stopped-flow kinetics**

$K_B$ , the equilibrium constant between the blocked and closed states, was calculated by measuring the rates of myosin strong binding to pyrene-labeled regulated thin filaments (RTFs) in the presence and absence of calcium, as previously described (8). Fluorescent RTFs (2.5 μM phalloidin-stabilized pyrene-actin and 1 μM troponin and tropomyosin) were rapidly mixed with 0.25 μM myosin subfragment-1 (S1) using an SX20 stopped-flow mixer (Applied Photophysics). All concentrations refer to the final concentrations after mixing. The pyrene fluorescence of the actin in the thin filaments was quenched by myosin strong binding, yielding an exponential decrease in

fluorescence.  $K_B$  was calculated by taking the ratio of the rate constants of myosin binding at low ( $k(-Ca^{2+})$ ; pCa 9) and high ( $k(+Ca^{2+})$ ; pCa 4) calcium, as described by McKillop and Geeves (8):

$$\frac{k(-Ca^{2+})}{k(+Ca^{2+})} = \frac{K_B}{1+K_B} \quad \text{Equation S1}$$

A single experiment consisted of recording at least three kinetic time traces at each calcium concentration followed by fitting of a single exponential function to the averaged traces. The reported  $K_B$  values (see Figure 4D) are the average of at least four independent experiments, and reported errors are the standard deviations of these values. Statistical significance between  $K_B$  values was evaluated using a Student's two-tailed t-test.

### **Measurement of steady-state myosin binding to regulated thin filaments to determine $K_T$ , $K_W$ , and $nH$**

The parameters  $K_T$ ,  $K_W$ , and  $nH$  were calculated from equilibrium titrations measuring the concentration-dependent binding of myosin to pyrene-labeled RTFs (8). Myosin strong binding to the pyrene-labeled RTFs quenches the fluorescence, thus the fractional change in fluorescence was measured as a function of myosin added. Fluorescence titrations were performed in buffer containing 60 mM MOPS, 200 mM KCl, 5 mM  $MgCl_2$ , 1 mM DTT, and either 2 mM EGTA (low  $Ca^{2+}$ ), 2 mM EGTA and 1.19 mM  $CaCl_2$  (pCa 6.25), or 1 mM  $CaCl_2$  (pCa 3). Reduced tropomyosin and phalloidin-stabilized pyrene-actin were each prepared as described above. RTFs (0.5  $\mu M$  phalloidin-stabilized pyrene-actin and 0.27  $\mu M$  troponin and tropomyosin) were continuously stirred and myosin S1 was added in the presence of 2 mM ADP, as well as

50  $\mu\text{M}$   $\text{P}^1, \text{P}^5$ -di(adenosine-5') pentaphosphate (Ap5a), 1  $\mu\text{M}$  hexokinase, and 2 mM glucose to maintain the nucleotide in the ADP state. Myosin S1 was added at 1-minute intervals in increments of 0.2  $\mu\text{M}$  up to 2  $\mu\text{M}$ , then at 1- $\mu\text{M}$  increments up to 10  $\mu\text{M}$ . The steady-state pyrene fluorescence was measured at 1-minute intervals. Five technical replicates per condition were collected.

## Supporting References

1. Greenberg, M. J., H. Shuman, and E. M. Ostap. 2014. Inherent force-dependent properties of beta-cardiac myosin contribute to the force-velocity relationship of cardiac muscle. *Biophysical Journal* 107:L41-44.
2. Pollard, T. D. 1984. Purification of a high molecular weight actin filament gelation protein from *Acanthamoeba* that shares antigenic determinants with vertebrate spectrins. *The Journal of Cell Biology* 99:1970-1980.
3. Greenberg, M. J., T. Lin, Y. E. Goldman, H. Shuman, and E. M. Ostap. 2012. Myosin IC generates power over a range of loads via a new tension-sensing mechanism. *Proceedings of the National Academy of Sciences of the United States of America* 109:E2433-2440.
4. Eads, T. M., D. D. Thomas, and R. H. Austin. 1984. Microsecond rotational motions of eosin-labeled myosin measured by time-resolved anisotropy of absorption and phosphorescence. *Journal of Molecular Biology* 179:55-81.
5. Hitchcock-DeGregori, S. E., and R. W. Heald. 1987. Altered actin and troponin binding of amino-terminal variants of chicken striated muscle alpha-tropomyosin expressed in *Escherichia coli*. *The Journal of Biological Chemistry* 262:9730-9735.
6. Kozaili, J. M., D. Leek, and L. S. Tobacman. 2010. Dual regulatory functions of the thin filament revealed by replacement of the troponin I inhibitory peptide with a linker. *The Journal of Biological Chemistry* 285:38034-38041.
7. Bers, D. M., C. W. Patton, and R. Nuccitelli. 2010. A practical guide to the preparation of Ca(2+) buffers. *Methods in Cell Biology* 99:1-26.
8. McKillop, D. F., and M. A. Geeves. 1993. Regulation of the interaction between actin and myosin subfragment 1: evidence for three states of the thin filament. *Biophysical Journal* 65:693-701.
